# Supplementary material
Source: Springer Nature journal article supplement (https://www.springermedizin.de/resource/supplementary/12943_2013_1168_MOESM5_ESM.pdf/9552586)
Supplement: MOESM5 [file 9552586]

## Additional file 5. TS candidate genes

| Gene name                   | Selected by              | Present in SAM <sub>intersect</sub> | Localization  | References (Search query "neuroblastoma AND tumour suppressor")                                                                                                                                                                                                                 |
|-----------------------------|--------------------------|-------------------------------------|---------------|---------------------------------------------------------------------------------------------------------------------------------------------------------------------------------------------------------------------------------------------------------------------------------|
| CACNA2D3                    | Thorell et al., 2009     | y                                   | 3p21.1        | Thorell K et al., BMC Med Genomics. 2009 Aug 17;2:53.                                                                                                                                                                                                                           |
| CAMTA1                      | Vermeulen et al., 2009   | y                                   | 1p36.31-26.23 | Henrich KO et al., Cancer Res. 2011 Apr 15;71(8):3142-51.                                                                                                                                                                                                                       |
| CD44                        | Vermeulen et al., 2009   | y                                   | 11p13         | Hoebeek J et al., Cancer Lett. 2009 Jan 18;273(2):336-46. Taran K et al., Folia Neuropathol. 2007;45(3):126-32.                                                                                                                                                                 |
| CDC42                       | Location                 | y                                   | 1p36.1        | Valentijn L J et al., Cancer Res. 2005 Apr 15;65(8):3136-45.                                                                                                                                                                                                                    |
| CHD5                        | Vermeulen et al., 2009   | y                                   | 1p36.31       | White PS et al., Oncogene. 2005 Apr 14;24(16):2684-94. Garcia I et al., Mol Cancer. 2010 Oct 15;9:277. Koyama H et al., Clin Cancer Res. 2012 Mar 15;18(6):1588-97.                                                                                                             |
| CLSTN1                      | Vermeulen et al., 2009   | y                                   | 1p36.22       | Fransson S et al., Genes Chromosomes Cancer. 2007 Jan;46(1):45-52. Janoueix-Lerosey I et al., Oncogene. 2004 Aug 5;23(35):5912-22.                                                                                                                                              |
| CNTNAP2                     | Thorell et al., 2009     | y                                   | 7p35          | Thorell K et al., BMC Med Genomics. 2009 Aug 17;2:53.                                                                                                                                                                                                                           |
| CTNNBIP1                    | Location                 | y                                   | 1p36.2        | Fransson S et al., Genes Chromosomes Cancer. 2007 Jan;46(1):45-52.                                                                                                                                                                                                              |
| DKK3                        | Literature               | y                                   | 11p15.3       | De Brouwer S et al., Int J Cancer. 2012 Jun 1;130(11):2591-8. Haug BH et al., Carcinogenesis. 2011 Jul;32(7):1005-12.                                                                                                                                                           |
| KIF1B                       | Location                 | y                                   | 1p36.2        | Munirajan AK et al., J Biol Chem. 2008 Sep 5;283(36):24426-34. Carén H et al., Mol Cancer. 2005 Mar 1;4(1):10. Krona C et al., Oncogene. 2003 Apr 17;22(15):2343-51. Ochiai H et al., Oncogene. 2010 May 6;29(18):2681-90. Ohira M et al., Oncogene. 2000 Aug 31;19(37):4302-7. |
| PIK3CD                      | Location                 | y                                   | 1p36.22       | Carén H et al., Br J Cancer. 2007 Nov 19;97(10):1416-24.                                                                                                                                                                                                                        |
| PRDM2 (alias RIZ)           | Vermeulen et al., 2009   | y                                   | 1p36.2        | Geli J et al., Int J Oncol. 2010 Nov;37(5):1323-30. Hoebeek J et al., Cancer Lett. 2009 Jan 18;273(2):336-46.                                                                                                                                                                   |
| PTN                         | Vermeulen et al., 2009   | y                                   | 7q33          | Nakagawara A et al., Cancer Res. 1995 Apr 15;55(8):1792-7.                                                                                                                                                                                                                      |
| SEMA3B                      | Thorell et al., 2009     | y                                   | 3p21.31       | Nair PN et al., Cancer Genet Cytogenet. 2007 Apr 15;174(2):100-10.                                                                                                                                                                                                              |
| TFAP2B                      | Thorell et al., 2009     | y                                   | 6p12.3        | Thorell K et al., BMC Med Genomics. 2009 Aug 17;2:53.                                                                                                                                                                                                                           |
| CADM1 (alias IGSF4 & TSLC1) | Vermeulen et al., 2009   | n                                   | 11q23.3       | Michels E et al., BMC Cancer. 2008 Jun 17;8:173. Ando K et al., Int J Cancer. 2008 Nov 1;123(9):2087-94.                                                                                                                                                                        |
| CASP8                       | Literature (methylation) | n                                   | 2q33.1        | Hoebeek J et al., Cancer Lett. 2009 Jan 18;273(2):336-46.                                                                                                                                                                                                                       |
| CASZ1                       | Location                 | n                                   | 1p36.22       | Liu Z et al., Cell Death Differ. 2011 Jul;18(7):1174-83. Carén H et al., Br J Cancer. 2007 Nov 19;97(10):1416-24.                                                                                                                                                               |
| CDH1                        | Literature (methylation) | n                                   | 16q22.1       | Hoebeek J et al., Cancer Lett. 2009 Jan 18;273(2):336-46.                                                                                                                                                                                                                       |
| ENO1                        | Location                 | n                                   | 1p36.2        | Ejeskär K et al., BMC Cancer. 2005 Dec 16;5:161.                                                                                                                                                                                                                                |
| GNB1                        | Vermeulen et al., 2009   | n                                   | 1p36.33       | Thorell K et al., BMC Med Genomics. 2009 Aug 17;2:53. Janoueix-Lerosey I et al., Oncogene. 2004 Aug 5;23(35):5912-22.                                                                                                                                                           |
| KRT19                       | Literature (methylation) | n                                   | 17q21.2       | Carén H et al., BMC Cancer. 2011 Feb 11;11:66.                                                                                                                                                                                                                                  |
| POU4F2                      | Thorell et al., 2009     | n                                   | 4q31.2        | Thorell K et al., BMC Med Genomics. 2009 Aug 17;2:53.                                                                                                                                                                                                                           |
| PTEN                        | Literature (methylation) | n                                   | 10q23.31      | Hoebeek J et al., Cancer Lett. 2009 Jan 18;273(2):336-46.                                                                                                                                                                                                                       |
| PTPRD                       | Literature               | n                                   | 9p24.1        | Clark O et al., Cancer Invest. 2012 Jun;30(5):422-32. Meehan M et al., Mol Cancer. 2012 Feb 5;11:6. Stallings RL et al., Cancer Res. 2006 Apr 1;66(7):3673-80.                                                                                                                  |
| RASSF1                      | Literature (methylation) | n                                   | 3p21.31       | Hoebeek J et al., Cancer Lett. 2009 Jan 18;273(2):336-46. Michalowski MB et al., Pediatr Blood Cancer. 2008 Jan;50(1):29-32.                                                                                                                                                    |
| RASSF5 (alias NORE1A)       | Literature (methylation) | n                                   | 1q32.1        | Djos A et al., Mol Cancer. 2012 Jun 13;11(1):40. Geli J et al., Int J Cancer. 2008 Jul 15;123(2):389-94.                                                                                                                                                                        |
| RASSF6                      | Literature (methylation) | n                                   | 4q13.3        | Djos A et al., Mol Cancer. 2012 Jun 13;11(1):40.                                                                                                                                                                                                                                |
| RASSF7                      | Literature (methylation) | n                                   | 11p15.5       | Djos A et al., Mol Cancer. 2012 Jun 13;11(1):40.                                                                                                                                                                                                                                |
| SLC35E2                     | Thorell et al., 2009     | n                                   | 1p36.33       | Thorell K et al., BMC Med Genomics. 2009 Aug 17;2:53.                                                                                                                                                                                                                           |
| TNFRSF25 (alias APO3)       | Vermeulen et al., 2009   | n                                   | 1p36.2        | Eggert A et al., Eur J Cancer. 2002 Jan;38(1):92-8. Okawa ER et al., Oncogene. 2008 Jan 31;27(6):803-10.                                                                                                                                                                        |
| UBE4B                       | Location                 | n                                   | 1p36.2        | Krona C et al., Oncogene. 2003 Apr 17;22(15):2343-51.                                                                                                                                                                                                                           |
| ZMYND10                     | Literature (methylation) | n                                   | 3p21.31       | Hoebeek J et al., Cancer Lett. 2009 Jan 18;273(2):336-46.                                                                                                                                                                                                                       |

Tumour suppressor genes were found by the PubMed search term "Neuroblastoma AND tumour suppressor", and from previous mining of literature lists according to Vermeulen et al., Lancet Oncol. 2009 July; 10(7): 663–671 (59 gene set) and Thorell et al., BMC Med Genomics 2009 Aug 17;2:53. Present in SAM<sub>intersect</sub>: genes found in the intersect SAM lists of data sets 1 & 2. y=yes; n=no.
